# Supplementary material
Source: PubMed Central journal article supplement (PMC2734163)
Supplement: gan081_2.pdf [file gan081_2.pdf]

**Supplemental Table 1:** Clinical and demographic information

| Trait                                        | White women (N = 82) | Black women (N = 65) | p-value |
|----------------------------------------------|----------------------|----------------------|---------|
| Age*                                         | 25 (18-41)           | 24 (18-40)           | 0.368   |
| Body Mass Index (BMI)*                       | 25.0 (18-46)         | 27.6 (18-48)         | 0.500   |
| Nugent Score*                                | 2 (0-10)             | 7 (0-10)             | <0.001  |
| Previous miscarriage                         | 28 (34.2)            | 14 (21.5)            | 0.093   |
| Previous preterm birth                       | 6 (7.3)              | 8 (12.5)             | 0.291   |
| Parity*                                      | 3(1-7)               | 4 (1-12)             | 0.042   |
| Smoking (before pregnancy)                   | 57 (69.5)            | 34 (52.3)            | 0.025   |
| Smoking (after pregnancy)                    | 53 (64.6)            | 29 (44.6)            | 0.012   |
| Smoking (cigarettes/day prior to pregnancy)* | 8.5 (0-40)           | 1 (0-25)             | 0.005   |
| Smoking (cigarettes/day after pregnancy)*    | 5 (0-40)             | 0 (0-25)             | 0.006   |
| <u>Martial Status</u>                        |                      |                      | 0.011   |
| single                                       | 25 (30.5)            | 32 (49.2)            |         |
| living with partner>4 months                 | 28 (34.2)            | 24 (36.9)            |         |
| married                                      | 24 (29.3)            | 6 (9.2)              |         |
| separated/divorced/widowed                   | 5 (6.1)              | 3 (4.6)              |         |
| <u>Highest Level of Education</u>            |                      |                      | 0.050   |
| junior high                                  | 20 (24.7)            | 18 (27.7)            |         |
| high school                                  | 43 (53.1)            | 42 (64.6)            |         |
| college/graduate school                      | 18 (22.2)            | 5 (7.7)              |         |
| <u>Employment status</u>                     |                      |                      | 0.343   |
| unemployed                                   | 37 (45.1)            | 35 (53.9)            |         |
| part-time                                    | 25 (30.5)            | 13 (20.0)            |         |
| full-time                                    | 20 (24.4)            | 17 (26.2)            |         |
| <u>Income</u>                                |                      |                      | 0.144   |
| <\$10,000                                    | 32 (40.5)            | 29 (46.0)            |         |
| \$10,000-\$25,000                            | 25 (31.7)            | 25 (39.7)            |         |
| >\$25,000                                    | 22 (27.9)            | 9 (14.3)             |         |

\* indicates values are represented by median and range, all other values are listed as number of observations (%).

**Supplemental Table 2:** Positional information of SNPs

| <i>RS#</i>             | <i>Location</i> | <i>SNP position</i> | <i>Gene</i> | <i>Genic Region</i> | <i>Allele Frequency</i> |               | <i>Ethnic Differences</i> |                  |
|------------------------|-----------------|---------------------|-------------|---------------------|-------------------------|---------------|---------------------------|------------------|
|                        |                 |                     |             |                     | <i>Whites</i>           | <i>Blacks</i> | <i>Allelic</i>            | <i>Genotypic</i> |
| rs10105164             | 4445            | chr8:67247821       | CRH         | 3' UTR              | 0.06 (T)                | 0.25 (T)      | <0.001                    | <0.001           |
| rs6996265              | 3362            | chr8:67248904       | CRH         | 3' UTR              | 0.12 (A)                | 0.45 (A)      | <0.001                    | <0.001           |
| rs3176921              | -1667           | chr8:67253933       | CRH         | Promoter            | 0.12 (C)                | 0.45 (C)      | <0.001                    | <0.001           |
| rs6472257              | -2468           | chr8:67254734       | CRH         | Promoter            | 0.12 (T)                | 0.28 (T)      | <0.001                    | 0.001            |
| rs7839698              | -4492           | chr8:67256758       | CRH         | Promoter            | 0.06 (T)                | 0.14 (T)      | 0.015                     | 0.049            |
| rs10098823             | -5915           | chr8:67258181       | CRH         | Promoter            | 0.05 (A)                | 0.31 (A)      | <0.001                    | <0.001           |
| rs32897                | 2012            | chr5:76286728       | CRHBP       | Intron              | 0.12 (G)                | 0.25 (G)      | 0.004                     | 0.012            |
| rs6453267              | 6796            | chr5:76291512       | CRHBP       | Intron              | 1.00 (G)                | 0.22 (A)      | <0.001                    | <0.001           |
| rs10055255             | 15033           | chr5:76299749       | CRHBP       | Intron              | 0.41 (T)                | 0.37 (A)      | <0.001                    | <0.001           |
| rs1875999              | 16022           | chr5:76300738       | CRHBP       | Exon                | 0.39 (G)                | 0.37 (G)      | 0.713                     | 0.944            |
| rs10514082             | 17487           | chr5:76302203       | CRHBP       | 3' UTR              | 0.15 (C)                | 0.06 (C)      | 0.014                     | 0.016            |
| rs17689966             | 9-50            | chr17:41266236      | CRHR1       | Intron              | 0.45 (G)                | 0.44 (A)      | 0.075                     | 0.148            |
| rs878887               | 50689           | chr17:41268363      | CRHR1       | Exon                | 0.24 (T)                | 0.05 (T)      | <0.001                    | <0.001           |
| rs4722999              | 28121           | chr7:30467015       | CRHR2       | Intron              | 0.30 (C)                | 0.29 (C)      | 0.895                     | 0.747            |
| rs12701020             | 26935           | chr7:30468201       | CRHR2       | Intron              | 0.16 (T)                | 0.03 (T)      | <0.001                    | <0.001           |
| rs7812133              | 10-76           | chr7:30468646       | CRHR2       | Intron              | 0.01 (A)                | 0.24 (A)      | <0.001                    | <0.001           |
| rs973002               | 22992           | chr7:30472144       | CRHR2       | Intron              | 0.14 (G)                | 0.13 (G)      | 0.863                     | 0.449            |
| rs929377               | 17737           | chr7:30477399       | CRHR2       | Intron              | 0.26 (A)                | 0.32 (T)      | <0.001                    | <0.001           |
| rs2240404              | 14594           | chr7:30480542       | CRHR2       | Intron              | 0.10 (A)                | 0.48 (G)      | <0.001                    | <0.001           |
| rs2190242*             | 12421           | chr7:30482715       | CRHR2       | Intron              | 0.18 (C)                | 0.14 (C)      | 0.332                     | 0.159            |
| rs2284217 <sup>+</sup> | 8288            | chr7:30486848       | CRHR2       | Intron              | 0.20 (A)                | 0.29 (A)      | 0.059                     | 0.096            |
| rs6462219              | 7595            | chr7:30487541       | CRHR2       | Intron              | 0.11 (T)                | 0.02 (T)      | 0.003                     | 0.002            |
| rs2284219              | 7460            | chr7:30487676       | CRHR2       | Intron              | 0.37 (A)                | 0.26 (G)      | <0.001                    | <0.001           |
| rs2267716              | 5253            | chr7:30489883       | CRHR2       | Intron              | 0.25 (C)                | 0.30 (T)      | <0.001                    | <0.001           |
| rs2267717              | 4853            | chr7:30490283       | CRHR2       | Intron              | 0.09 (A)                | 0.16 (A)      | 0.075                     | 0.107            |

\* indicates marker deviated from HWE in whites ( $p < 0.05$ )<sup>+</sup> indicates marker deviated from HWE in blacks ( $p < 0.05$ )

**Supplemental Table 3:** Nugent score analysis of whites (a) and blacks (b) both with and without smoking.

| a. White women |                 | Single Locus Association |                  |                 | Gene by Smoking |                  |                 |
|----------------|-----------------|--------------------------|------------------|-----------------|-----------------|------------------|-----------------|
| <i>Gene</i>    | <i>Location</i> | <i>Additive</i>          | <i>Recessive</i> | <i>Dominant</i> | <i>Additive</i> | <i>Recessive</i> | <i>Dominant</i> |
| CRH            | 4445            | N/A                      | N/A              | 0.525           | N/A             | N/A              | N/A             |
| CRH            | 3362            | N/A                      | N/A              | 0.518           | N/A             | N/A              | N/A             |
| CRH            | -1667           | N/A                      | N/A              | 0.518           | N/A             | N/A              | N/A             |
| CRH            | -2468           | N/A                      | N/A              | 0.518           | N/A             | N/A              | N/A             |
| CRH            | -4492           | N/A                      | N/A              | 0.525           | N/A             | N/A              | N/A             |
| CRH            | -5915           | N/A                      | N/A              | 0.840           | N/A             | N/A              | N/A             |
| CRH-BP         | 2012            | N/A                      | N/A              | 0.335           | N/A             | N/A              | 0.083           |
| CRH-BP         | 15033           | 0.047                    | 0.015*           | 0.234           | N/A             | N/A              | 0.027*          |
| CRH-BP         | 16022           | 0.206                    | 0.082            | 0.395           | N/A             | N/A              | 0.059           |
| CRH-BP         | 17487           | N/A                      | N/A              | 0.610           | N/A             | N/A              | 0.002*          |
| CRH-R1         | 9-50            | 0.053                    | 0.478            | 0.016*          | 0.112           | 0.422            | 0.042           |
| CRH-R1         | 50689           | 0.728                    | 0.532            | 0.498           | N/A             | N/A              | 0.233           |
| CRH-R2         | 28121           | 0.684                    | 0.712            | 0.495           | N/A             | N/A              | 0.528           |
| CRH-R2         | 26935           | N/A                      | N/A              | 0.413           | N/A             | N/A              | 0.452           |
| CRH-R2         | 22992           | N/A                      | N/A              | 0.181           | N/A             | N/A              | 0.115           |
| CRH-R2         | 17737           | 0.662                    | 0.366            | 0.789           | N/A             | N/A              | 0.123           |
| CRH-R2         | 14594           | N/A                      | N/A              | 0.244           | N/A             | N/A              | N/A             |
| CRH-R2         | 12421           | N/A                      | N/A              | 0.155           | N/A             | N/A              | 0.339           |
| CRH-R2         | 8288            | N/A                      | N/A              | 0.153           | N/A             | N/A              | 0.185           |
| CRH-R2         | 7595            | N/A                      | N/A              | 0.064           | N/A             | N/A              | 0.158           |
| CRH-R2         | 7460            | 0.186                    | 0.165            | 0.465           | N/A             | N/A              | 0.414           |
| CRH-R2         | 5253            | 0.099                    | 0.032*           | 0.404           | N/A             | N/A              | 0.496           |
| CRH-R2         | 4853            | N/A                      | N/A              | 0.048           | N/A             | N/A              | N/A             |

| b. Black women |                 | Single Locus Association |                  |                 | Gene by Smoking |                  |                 |
|----------------|-----------------|--------------------------|------------------|-----------------|-----------------|------------------|-----------------|
| <i>Gene</i>    | <i>Location</i> | <i>Additive</i>          | <i>Recessive</i> | <i>Dominant</i> | <i>Additive</i> | <i>Recessive</i> | <i>Dominant</i> |
| CRH            | 4445            | 0.277                    | 0.161            | 0.870           | N/A             | N/A              | 0.041           |
| CRH            | 3362            | 0.005*                   | 0.062            | 0.080           | N/A             | N/A              | 0.007*          |
| CRH            | -1667           | 0.005*                   | 0.062            | 0.080           | N/A             | N/A              | 0.007*          |
| CRH            | -2468           | 0.185                    | 0.558            | 0.148           | N/A             | N/A              | 0.014*          |
| CRH            | -4492           | N/A                      | N/A              | 0.957           | N/A             | N/A              | 0.080           |
| CRH            | -5915           | 0.088                    | 0.159            | 0.263           | N/A             | N/A              | 0.039           |
| CRH-BP         | 2012            | N/A                      | N/A              | 0.925           | N/A             | N/A              | 0.054           |
| CRH-BP         | 6796            | N/A                      | N/A              | 0.737           | N/A             | N/A              | 0.072           |
| CRH-BP         | 15033           | 0.871                    | 0.824            | 0.608           | N/A             | N/A              | 0.134           |
| CRH-BP         | 16022           | 0.632                    | 0.339            | 0.852           | N/A             | N/A              | 0.042           |
| CRH-BP         | 17487           | N/A                      | N/A              | 0.510           | N/A             | N/A              | N/A             |
| CRH-R1         | 9-50            | 0.316                    | 0.129            | 0.698           | 0.154           | 0.047            | 0.123           |
| CRH-R1         | 50689           | N/A                      | N/A              | 0.992           | N/A             | N/A              | N/A             |
| CRH-R2         | 28121           | 0.907                    | 0.990            | 0.670           | N/A             | N/A              | 0.070           |
| CRH-R2         | 10-76           | N/A                      | N/A              | 0.225           | N/A             | N/A              | 0.043           |
| CRH-R2         | 22992           | N/A                      | N/A              | 0.395           | N/A             | N/A              | 0.064           |

|        |       |       |       |       |       |       |                    |
|--------|-------|-------|-------|-------|-------|-------|--------------------|
| CRH-R2 | 17737 | 0.785 | 0.764 | 0.622 | N/A   | N/A   | 0.062              |
| CRH-R2 | 14594 | 0.972 | 0.969 | 0.814 | 0.228 | 0.076 | 0.082              |
| CRH-R2 | 12421 | N/A   | N/A   | 0.904 | N/A   | N/A   | 0.065              |
| CRH-R2 | 8288  | N/A   | N/A   | 0.236 | N/A   | N/A   | 0.027 <sup>*</sup> |
| CRH-R2 | 7460  | 0.569 | 0.342 | 0.449 | N/A   | N/A   | 0.063              |
| CRH-R2 | 5253  | 0.626 | 0.366 | 0.557 | N/A   | N/A   | 0.021 <sup>*</sup> |
| CRH-R2 | 4853  | N/A   | N/A   | 0.066 | N/A   | N/A   | 0.013 <sup>*</sup> |

<sup>D</sup>Indicates the dominant model was the best or only model

<sup>R</sup>Indicates the recessive model was the best or only model

<sup>A</sup>Indicates the additive model was the best or only model

<sup>\*</sup> Indicates result is significant after correction for multiple testing

N/A indicates the test was not performed due to small sample sizes (< 5 observations per cell)

**Supplemental Table 4: Case-Control single locus association analysis.**

| <i>Gene</i> | <i>Location</i> | <i>Allele</i> | White women     |                  |                 | Black women     |                  |                 |       |
|-------------|-----------------|---------------|-----------------|------------------|-----------------|-----------------|------------------|-----------------|-------|
|             |                 |               | <i>Additive</i> | <i>Recessive</i> | <i>Dominant</i> | <i>Additive</i> | <i>Recessive</i> | <i>Dominant</i> |       |
| CRH         | 4445            | 0.481         | 0.739           | N/A              | 0.713           | 0.381           | 0.107            | 0.074           | 1.000 |
| CRH         | 3362            | 0.778         | 0.749           | N/A              | 0.763           | 1.000           | 0.011            | 0.120           | 0.153 |
| CRH         | -1667           | 0.770         | 0.744           | N/A              | 0.763           | 1.000           | 0.009            | 0.120           | 0.153 |
| CRH         | -2468           | 0.779         | 0.762           | N/A              | 0.763           | 0.224           | 0.152            | 1.000           | 0.112 |
| CRH         | -4492           | 0.483         | 0.711           | N/A              | 0.713           | 0.586           | 0.753            | 0.510           | 1.000 |
| CRH         | -5915           | 1.000         | 1.000           | N/A              | 1.000           | 0.536           | 0.316            | 0.688           | 0.289 |
| CRH-BP      | 2012            | 0.299         | 0.700           | 1.000            | 0.397           | 0.543           | 0.698            | 1.000           | 0.592 |
| CRH-BP      | 6796            | N/A           | N/A             | N/A              | N/A             | 0.151           | 0.405            | 0.265           | 0.401 |
| CRH-BP      | 15033           | 0.011         | 0.037           | 0.015            | 0.171           | 0.843           | 0.926            | 1.000           | 0.773 |
| CRH-BP      | 16022           | 0.046         | 0.080           | 0.074            | 0.283           | 0.692           | 1.000            | 1.000           | 1.000 |
| CRH-BP      | 17487           | 0.623         | 0.586           | N/A              | 0.587           | 0.684           | 1.000            | N/A             | 1.000 |
| CRH-R1      | 9-50            | 0.031         | 0.046           | 0.528            | 0.022           | 0.693           | 0.404            | 0.283           | 1.000 |
| CRH-R1      | 50689           | 0.034         | 0.156           | 0.313            | 0.116           | 0.671           | 1.000            | N/A             | 1.000 |
| CRH-R2      | 28121           | 0.683         | 0.749           | 1.000            | 0.608           | 0.533           | 0.735            | 0.384           | 0.790 |
| CRH-R2      | 26935           | 0.456         | 0.397           | N/A              | 0.430           | 0.651           | 1.000            | N/A             | 1.000 |
| CRH-R2      | 10-76           | N/A           | 0.313           | N/A              | 0.297           | 0.254           | 0.511            | 0.271           | 0.592 |
| CRH-R2      | 22992           | 0.132         | 0.167           | N/A              | 0.160           | 0.552           | 0.478            | 1.000           | 0.517 |
| CRH-R2      | 17737           | 0.304         | 0.258           | 0.209            | 0.451           | 0.435           | 0.472            | 1.000           | 0.290 |
| CRH-R2      | 14594           | 1.000         | 0.299           | 0.297            | 0.764           | 0.848           | 0.948            | 1.000           | 0.771 |
| CRH-R2      | 12421           | 0.337         | 0.287           | N/A              | 0.289           | 0.782           | 1.000            | N/A             | 1.000 |
| CRH-R2      | 8288            | 0.383         | 0.505           | 1.000            | 0.307           | 0.827           | 0.486            | 0.510           | 0.788 |
| CRH-R2      | 7595            | 0.147         | 0.129           | N/A              | 0.124           | 1.000           | 1.000            | N/A             | 1.000 |
| CRH-R2      | 7460            | 0.590         | 0.400           | 0.265            | 0.800           | 0.219           | 0.474            | 0.641           | 0.278 |
| CRH-R2      | 5253            | 0.061         | 0.175           | 0.096            | 0.309           | 0.403           | 0.648            | 0.642           | 0.420 |
| CRH-R2      | 4853            | 0.105         | 0.158           | N/A              | 0.187           | 0.810           | 0.224            | 0.510           | 0.388 |

\* Indicates result is significant after correction for multiple testing

N/A indicates the test was not performed due to small sample sizes (< 5 observations per cell)

**Supplemental Table 5:** Nugent score comparisons between genotypes for non-smokers (NS) and smokers (S) and between smoking status for each genotype in white women (a) and black women (b) for any significant result (p<0.05)

a. White women

| <i>Gene</i>         | <i>Location</i> | <i>Genotype 1</i> | <i>Genotype 2</i> | <i>Genotype 1 vs Genotype 2</i> |          | <i>Non-smokers vs Smokers</i> |                   |
|---------------------|-----------------|-------------------|-------------------|---------------------------------|----------|-------------------------------|-------------------|
|                     |                 |                   |                   | <i>NS</i>                       | <i>S</i> | <i>Genotype 1</i>             | <i>Genotype 2</i> |
| CRH-BP <sup>D</sup> | 15033           | AA                | AT/TT             | 0.080                           | 0.027*   | 0.183                         | 0.017*            |
| CRH-BP <sup>D</sup> | 17487           | CC/CT             | TT                | 0.002*                          | 0.021*   | 0.001*                        | 0.417             |
| CRH-R1 <sup>D</sup> | 9-50            | AA/AG             | GG                | 0.136                           | 0.050    | 0.428                         | 0.142             |

b. Black women

| <i>Gene</i>         | <i>Location</i> | <i>Genotype 1</i> | <i>Genotype 2</i> | <i>Genotype 1 vs Genotype 2</i> |          | <i>Non-smokers vs Smokers</i> |                   |
|---------------------|-----------------|-------------------|-------------------|---------------------------------|----------|-------------------------------|-------------------|
|                     |                 |                   |                   | <i>NS</i>                       | <i>S</i> | <i>Genotype 1</i>             | <i>Genotype 2</i> |
| CRH <sup>D</sup>    | 4445            | CC/CT             | TT                | 0.349                           | 0.317    | 0.219                         | 0.012*            |
| CRH <sup>D</sup>    | 3362            | AA/AG             | GG                | 0.019*                          | 0.926    | 0.003*                        | 0.913             |
| CRH <sup>D</sup>    | -1667           | AA/AG             | GG                | 0.019*                          | 0.926    | 0.003*                        | 0.913             |
| CRH <sup>D</sup>    | -2468           | CC                | CT/TT             | 0.044                           | 0.535    | 0.145                         | 0.009*            |
| CRH <sup>D</sup>    | -5915           | AA/AC             | CC                | 0.128                           | 0.887    | 0.019*                        | 0.213             |
| CRH-BP <sup>D</sup> | 16022           | AA/AG             | GG                | 0.464                           | 0.167    | 0.024*                        | 0.123             |
| CRH-R1 <sup>R</sup> | 9-50            | AA                | AG/GG             | 0.334                           | 0.124    | 0.212                         | 0.025*            |
| CRH-R2 <sup>D</sup> | 10-76           | AA/AG             | GG                | 0.714                           | 0.127    | 0.027*                        | 0.260             |
| CRH-R2 <sup>D</sup> | 8288            | AA/AG             | GG                | 0.261                           | 0.251    | 0.010*                        | 0.178             |
| CRH-R2 <sup>D</sup> | 5253            | CC                | CT/TT             | 0.406                           | 0.172    | 0.008*                        | 0.360             |
| CRH-R2 <sup>D</sup> | 4853            | AA/AG             | GG                | 0.281                           | 0.064    | 0.109                         | 0.022*            |

\* Indicates result is significant after correction for multiple testing

<sup>D</sup> Indicates dominant model was used to test pair-wise comparisons

<sup>R</sup> Indicates recessive model was used to test pair-wise comparisons

**Supplemental Table 6:** Haplotype results for whites (a) and blacks (b).

## a. Whites

| <u>CRH-BP Haplotypes</u>  | <u>Global p-value</u> | <u>Global permuted p-value</u> |
|---------------------------|-----------------------|--------------------------------|
| 2012 15033                | 0.006                 | 0.007                          |
| 15033 16022               | 0.017                 | 0.016                          |
| 16022 17487               | 0.285                 | 0.274                          |
| 2012 15033 16022          | 0.008                 | 0.010                          |
| 15033 16022 17487         | 0.040                 | 0.050                          |
| 2012 15033 16022 17487    | 0.061                 | 0.078                          |
| <u>CRH-R1 Hayplotypes</u> | <u>Global p-value</u> | <u>Global permuted p-value</u> |
| 9-50 50689                | 0.148                 | 0.173                          |
| <u>CRH-R2 Haplotypes</u>  | <u>Global p-value</u> | <u>Global permuted p-value</u> |
| 28121 26935               | 0.588                 | 0.609                          |
| 26935 22992               | 0.183                 | 0.185                          |
| 22992 17737               | 0.369                 | 0.381                          |
| 17737 14594               | 0.345                 | 0.378                          |
| 14594 12421               | 0.137                 | 0.175                          |
| 12421 8288                | 0.312                 | 0.331                          |
| 8288 7595                 | 0.172                 | 0.176                          |
| 7595 7460                 | 0.125                 | 0.145                          |
| 7460 5253                 | 0.057                 | 0.062                          |
| 5253 4853                 | 0.072                 | 0.089                          |
| 28121 26935 22992         | 0.475                 | 0.308                          |
| 26935 22992 17737         | 0.573                 | 0.450                          |
| 22992 17737 14594         | 0.529                 | 0.582                          |
| 17737 14594 12421         | 0.164                 | 0.195                          |
| 14594 12421 8288          | 0.433                 | 0.466                          |
| 12421 8288 7595           | 0.488                 | 0.369                          |
| 8288 7595 7460            | 0.219                 | 0.241                          |
| 7595 7460 5253            | 0.061                 | 0.100                          |
| 7460 5253 4853            | 0.121                 | 0.153                          |
| 28121 26935 22992 17737   | 0.482                 | 0.538                          |
| 26935 22992 17737 14594   | 0.414                 | 0.487                          |
| 22992 17737 14594 12421   | 0.097                 | 0.089                          |
| 17737 14594 12421 8288    | 0.295                 | 0.313                          |
| 14594 12421 8288 7595     | 0.313                 | 0.332                          |
| 12421 8288 7595 7460      | 0.211                 | 0.283                          |
| 8288 7595 7460 5253       | 0.116                 | 0.161                          |
| 7595 7460 5253 4853       | 0.123                 | 0.139                          |

## b. Blacks

| <u>CRH Haplotype</u> | <u>Global p-value</u> | <u>Global permuted p-value</u> |
|----------------------|-----------------------|--------------------------------|
| 4445 3362            | 0.764                 | 0.784                          |
| 3362 -1667           | 0.971                 | 0.961                          |
| -1667 -2468          | 0.499                 | 0.503                          |
| -2468 -4492          | 0.406                 | 0.425                          |
| -4492 -5915          | 0.977                 | 0.974                          |

|                         |       |       |
|-------------------------|-------|-------|
| 4445 3362 -1667         | 0.764 | 0.764 |
| 3362 -1667 -2468        | 0.499 | 0.515 |
| -1667 -2468 -4492       | 0.505 | 0.536 |
| -2468 -4492 -5915       | 0.505 | 0.534 |
| 4445 3362 -1667 -2468   | 0.570 | 0.599 |
| 3362 -1667 -2468 -4492  | 0.505 | 0.531 |
| -1667 -2468 -4492 -5915 | 0.505 | 0.547 |



**Supplemental Table 7:** Haplotype results adjusted for smoking in whites (a) and blacks (b).

a. white women

| <u>CRH-BP Haplotypes</u> | <u>Global p-value</u> | <u>Global permuted p-value</u> |
|--------------------------|-----------------------|--------------------------------|
| 2012 15033               | 0.011                 | 0.014                          |
| 15033 16022              | 0.037                 | 0.064                          |
| 16022 17487              | 0.391                 | 0.421                          |
| 2012 15033 16022         | 0.016                 | 0.026                          |
| 15033 16022 17487        | 0.081                 | 0.107                          |
| 2012 15033 16022 17487   | 0.114                 | 0.159                          |
| <u>CRH-R1 Haplotypes</u> | <u>Global p-value</u> | <u>Global permuted p-value</u> |
| 9-50 50689               | 0.185                 | 0.202                          |

b. black women

| <u>CRH Haplotypes</u>    | <u>Global p-value</u> | <u>Global permuted p-value</u> |
|--------------------------|-----------------------|--------------------------------|
| 4445 3362                | 0.656                 | 0.676                          |
| 3362 -1667               | 0.784                 | 0.753                          |
| -4135                    | 0.394                 | 0.420                          |
| -6960                    | 0.284                 | 0.285                          |
| -10407                   | 0.943                 | 0.937                          |
| 4445 3362 -1667          | 0.656                 | 0.681                          |
| 3362 -1667 -2468         | 0.394                 | 0.400                          |
| -8627                    | 0.401                 | 0.415                          |
| -12875                   | 0.401                 | 0.447                          |
| 4445 3362 -1667 -2468    | 0.502                 | 0.561                          |
| 3362 -1667 -2468 -4492   | 0.401                 | 0.455                          |
| -14542                   | 0.401                 | 0.431                          |
| <u>CRH-BP Haplotypes</u> | <u>Global p-value</u> | <u>Global permuted p-value</u> |
| 2012 6796                | 0.284                 | 0.328                          |
| 6796 15033               | 0.604                 | 0.620                          |
| 15033 16022              | 0.645                 | 0.746                          |
| 16022 17487              | 0.195                 | 0.202                          |
| 2012 6796 15033          | 0.330                 | 0.405                          |
| 6796 15033 16022         | 0.636                 | 0.743                          |
| 15033 16022 17487        | 0.412                 | 0.558                          |
| 2012 6796 15033 16022    | 0.683                 | 0.731                          |
| 6796 15033 16022 17487   | 0.292                 | 0.343                          |
| <u>CRH-R1 Haplotypes</u> | <u>Global p-value</u> | <u>Global permuted p-value</u> |
| 9-50 50689               | 0.394                 | 0.388                          |
| <u>CRH-R2 Haplotypes</u> | <u>Global p-value</u> | <u>Global permuted p-value</u> |
| 28121 10-76              | 0.554                 | 0.589                          |
| 10-76 22992              | 0.557                 | 0.559                          |
| 22992 17737              | 0.982                 | 0.986                          |
| 17737 14594              | 0.951                 | 0.960                          |
| 14594 12421              | 0.112                 | 0.156                          |
| 12421 8288               | 0.451                 | 0.449                          |

|                         |       |       |
|-------------------------|-------|-------|
| 8288 7460               | 0.379 | 0.405 |
| 7460 5253               | 0.896 | 0.907 |
| 5253 4853               | 0.335 | 0.332 |
| 28121 10-76 22992       | 0.756 | 0.774 |
| 10-76 22992 17737       | 0.901 | 0.854 |
| 22992 17737 14594       | 0.863 | 0.866 |
| 17737 14594 12421       | 0.967 | 0.976 |
| 14594 12421 8288        | 0.761 | 0.797 |
| 12421 8288 7460         | 0.537 | 0.599 |
| 8288 7460 5253          | 0.553 | 0.573 |
| 7460 5253 4853          | 0.429 | 0.477 |
| 28121 10-76 22992 17737 | 0.673 | 0.705 |
| 10-76 22992 17737 14594 | 0.937 | 0.895 |
| 22992 17737 14594 12421 | 0.960 | 0.967 |
| 17737 14594 12421 8288  | 0.778 | 0.837 |
| 14594 12421 8288 7460   | 0.925 | 0.944 |
| 12421 8288 7460 5253    | 0.665 | 0.707 |
| 8288 7460 5253 4853     | 0.601 | 0.642 |
