# Supplementary material
Source: PubMed Central journal article supplement (PMC2734163)

# Supplemental Figure 2

**A**

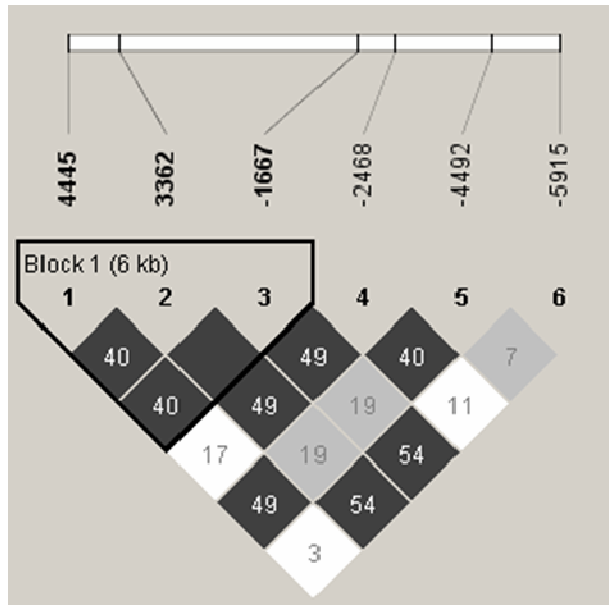

**B**

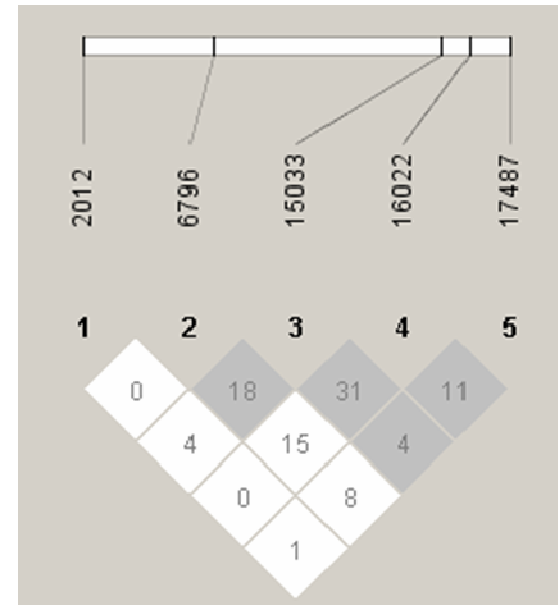

**C**

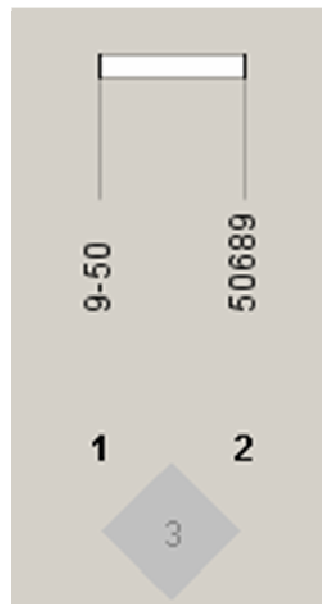

**D**

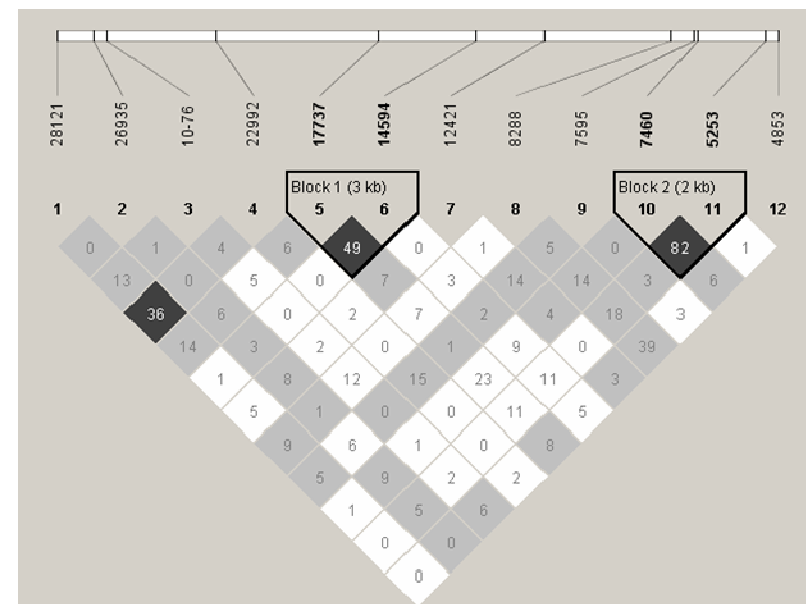

Supplement: gan081_1.pdf [file gan081_1.pdf]
